# Supplementary material for: Utilization of Thermophilic Aerobic Oxidation and Electrocoagulation to Improve Fertilizer Quality from Mixed Manure Influent
Source: MDPI journal article supplement (doi:10.3390/agronomy12061417), 2022-06-13
Supplement: s1 [file s1]

**Supplemental Table S1:** Application rate for TS and plant-available nutrients(\*).

| Items                                                        | LSM   |          |              | Influent |          |               |
|--------------------------------------------------------------|-------|----------|--------------|----------|----------|---------------|
|                                                              | mg/L  | Kg/1000L | kg/ha        | mg/L     | Kg/1000L | kg/ha         |
| TS                                                           | 7.7   | 0.88     | 1063         | 6.0      | 0.006    | 512           |
| TN                                                           | 969   | 0.969    |              | 1482     | 1.482    |               |
| NH <sub>4</sub> -N                                           | 270   | 0.270    |              | 751      | 0.751    |               |
| NO <sub>3</sub> -N                                           | 173   | 0.173    |              | 162      | 0.162    |               |
| Org-N*                                                       | 526   | 0.526    |              | 569      | 0.006    |               |
| PAN*+                                                        | 811.2 | 0.8112   | <b>1063*</b> | 1311.3   | 1.3113   | <b>85411*</b> |
| P                                                            | 126   | 0.126    |              | 569      | 0.569    |               |
| P <sub>2</sub> O <sub>5</sub> *                              | 289   | 0.289    | <b>40*</b>   | 323      | 0.323    | <b>28*</b>    |
| K                                                            | 788   | 0.788    |              | 1311.3   | 1.311    |               |
| K <sub>2</sub> O*                                            | 950   | 0.950    | <b>131*</b>  | 1104     | 1.104    | <b>94*</b>    |
| +PAN = (0.7*Org-N + NH <sub>4</sub> -N + NO <sub>3</sub> -N) |       |          |              |          |          |               |

**Supplemental Table S2:** Application rate for heavy metals and minerals.

| Items           | LSM   |        |        | Influent |        |        |
|-----------------|-------|--------|--------|----------|--------|--------|
|                 | mg/kg | g/ha   | kg/ha  | mg/kg    | g/ha   | kg/ha  |
| Cr              | 1.32  | 1.40   | 0.0014 | 1.1      | 1.17   | 0.0012 |
| Cu              | 1.22  | 1.30   | 0.0013 | 1.2      | 1.28   | 0.0013 |
| Ni              | 0.17  | 0.18   | 0.0002 | 0.5      | 0.53   | 0.0005 |
| Zn              | 6.87  | 7.30   | 0.0073 | 5.7      | 6.06   | 0.0061 |
| Mg              | 119.6 | 127.15 | 0.1271 | 100.2    | 106.52 | 0.1065 |
| Ca              | 157.5 | 167.44 | 0.1674 | 164.9    | 175.31 | 0.1753 |
| SO <sub>4</sub> | 141   | 149.90 | 0.1499 | 134.6    | 143.10 | 0.1431 |
| Fe              | 24.4  | 25.94  | 0.0259 | 29.5     | 31.36  | 0.0314 |
